# Supplementary material
Source: PubMed Central journal article supplement (PMC2804871)
Supplement: NIHMS88236-supplement-01.pdf [file NIHMS88236-supplement-01.pdf]

**Supplemental Figure S1.** Effect of instantaneous application of 5  $\mu\text{M}$  flg22 on  $\text{K}^+$  currents of wild type Arabidopsis guard cells.
